# Supplementary material for: A new insight into the initial step in the Fischer–Tropsch synthesis: CO dissociation on Ru surfaces
Source: Royal Society of Chemistry journal article supplement (doi:10.1039/c2cp43176a), 2012-01-01
Supplement: c2cp43176a.pdf [file c2cp43176a.pdf]

## Supporting information

# A new insight into the initial step in the Fischer-Tropsch synthesis: CO dissociation on Ru surfaces

Hongping Li, Gang Fu and XinXu\*

State Key Laboratory of Physical Chemistry of Solid Surfaces; College for Chemistry and  
Chemical Engineering, Xiamen University, Xiamen 361005, China

Shanghai Key Laboratory of Molecular Catalysis and Innovative Materials, MOE Laboratory for  
Computational Physical Science, Department of Chemistry, Fudan University, Shanghai, 200433,  
China

Corresponding author: [xinxu@xmu.edu.cn](mailto:xinxu@xmu.edu.cn); [xxchem@fudan.edu.cn](mailto:xxchem@fudan.edu.cn)

Table S1. The calculated adsorption energies on the stepped Ru(0001) and Ru(11 $\bar{2}$ 1) surfaces <sup>a</sup>

|     | Stepped Ru(0001) |               | Ru(11 $\bar{2}$ 1) |                   |
|-----|------------------|---------------|--------------------|-------------------|
| C   | 7.61             | (4F, 1-2-3-4) | 7.39               | (4F, 1-2-3-4)     |
| O   | 5.94             | (3F, 1-2-10)  | 6.01               | (bri, 5-6)        |
| H   | 2.89             | (3F, 5-6-7)   | 2.88               | (3F, 1-2-10)      |
| HCO | 3.06             | (B5 site)     | 2.50               | (6F, 1-2-3-4-5-6) |
| CH  | 6.94             | (4F, 1-2-3-4) | 6.68               | (4F, 1-2-3-4)     |
| CO  | 2.04             | (B5 site)     | 1.75               | (6F, 1-2-3-4-5-6) |

<sup>a</sup> Energies are in eV. The adsorption sites are given in the corresponding parentheses.

Table S2. Selected bonding distances before and after co-adsorption of O\* on the Ru(11 $\bar{2}$ 1) surface. Unit: Å.

|          | No co-adsorbate | O* co-adsorbed |
|----------|-----------------|----------------|
| H*+CO*   | C-Ru1: 2.178    | C-Ru1: 2.082   |
|          | C-Ru2: 2.179    | C-Ru2: 1.987   |
|          | C-Ru3: 2.204    | C-Ru3: 2.821   |
|          | C-Ru4: 2.225    | C-Ru4: 3.102   |
|          | C-O: 1.302      | C-O: 1.238     |
|          | O-Ru5: 2.166    | O-Ru5: 2.251   |
|          | O-Ru6:2.840     | O-Ru6:3.160    |
| H*+C*+O* | C-Ru1: 1.925    | C-Ru1: 1.954   |
|          | C-Ru2: 2.027    | C-Ru2: 1.967   |
|          | C-Ru3: 2.118    | C-Ru3: 2.010   |
|          | C-Ru4: 1.996    | C-Ru4: 2.062   |
|          | O-Ru5: 1.885    | O-Ru5: 1.887   |
|          | O-Ru6:1.949     | O-Ru6:1.945    |
| HCO*     | C-Ru1: 2.369    | C-Ru1: 2.755   |
|          | C-Ru2: 2.379    | C-Ru2: 2.489   |
|          | C-Ru3: 2.171    | C-Ru3: 2.083   |
|          | C-Ru4: 2.143    | C-Ru4: 2.133   |
|          | C-O: 1.372      | C-O: 1.365     |
|          | O-Ru5: 2.151    | O-Ru5: 2.116   |
|          | O-Ru6:2.278     | O-Ru6:2.237    |
| CH*+O*   | C-Ru1: 2.035    | C-Ru1: 2.085   |
|          | C-Ru2: 2.110    | C-Ru2: 2.046   |
|          | C-Ru3: 2.199    | C-Ru3: 2.133   |
|          | C-Ru4: 2.130    | C-Ru4: 2.214   |
|          | O-Ru5: 1.887    | O-Ru5: 1.892   |
|          | O-Ru6:1.965     | O-Ru6:1.959    |
| TS1      | C...H: 1.350    | C...H: 1.363   |
| TS2      | C...O: 1.835    | C...O: 1.827   |
| TS3      | C...O: 1.922    | C...O: 1.991   |
| TS4      | C...H: 1.500    | C...H: 1.487   |

Table S3. Selected bonding distances before and after co-adsorption of O\* on the stepped Ru(0001) surface. Unit: Å.

|          | No co-adsorbate | O* co-adsorbed |
|----------|-----------------|----------------|
| H*+CO*   | C-Ru3: 2.072    | C-Ru3: 2.083   |
|          | C-Ru4: 2.071    | C-Ru4: 2.079   |
|          | C-Ru5: 2.069    | C-Ru5: 2.069   |
|          | C-O: 1.305      | C-O: 1.297     |
|          | O-Ru1: 2.317    | O-Ru1: 2.348   |
|          | O-Ru2:2.302     | O-Ru2:2.348    |
| H*+C*+O* | C-Ru1: 2.082    | C-Ru1: 2.091   |
|          | C-Ru2: 2.098    | C-Ru2: 2.071   |
|          | C-Ru3: 1.993    | C-Ru3: 1.995   |
|          | C-Ru4: 1.986    | C-Ru4: 1.982   |
|          | O-Ru1: 2.060    | O-Ru1: 2.039   |
|          | O-Ru2:2.034     | O-Ru2:2.029    |
| HCO*     | O-Ru10:2.060    | O-Ru10:2.026   |
|          | C-Ru3: 2.100    | C-Ru3: 2.107   |
|          | C-Ru4: 2.104    | C-Ru4: 2.106   |
|          | C-Ru5: 2.269    | C-Ru5: 2.253   |
|          | C-O: 1.372      | C-O: 1.355     |
|          | O-Ru1: 2.168    | O-Ru1: 2.218   |
| CH*+O*   | O-Ru2:2.182     | O-Ru2:2.214    |
|          | C-Ru1: 2.295    | C-Ru1: 2.233   |
|          | C-Ru2: 2.279    | C-Ru2: 2.238   |
|          | C-Ru3: 2.084    | C-Ru3: 2.096   |
|          | C-Ru4: 2.087    | C-Ru4: 2.093   |
|          | O-Ru1: 2.054    | O-Ru1: 2.032   |
| TS       | O-Ru2:2.028     | O-Ru2:2.028    |
|          | O-Ru10:2.065    | O-Ru10:2.066   |
|          | C...H: 1.544    | C...H: 1.514   |
|          | C...O: 1.816    | C...O: 1.866   |
| TS3      | C...O: 1.942    | C...O: 2.026   |
| TS4      | C...H: 1.442    | C...H: 1.445   |
